# Supplementary material
Source: Research Square preprint supplement (doi:10.21203/rs.3.rs-9427652/v1)
Supplement: Supplementary file 1 [file 44467d8c0e0f8d44ccd02dc4.docx]

**Blood levels of Persistent Organic Pollutants and circulating biomarkers of systemic inflammation in French women: Evidence from the E3N-Generations cohort**

Francesca Romana Mancini1*, Pauline Frénoy1, German Cano-Sancho2, Jean-Philippe Antignac2, Philippe Marchand2, Bruno Le Bizec2, Chloé Marques1, Xuan Ren1, Vittorio Perduca3,1, Gianluca Severi1,4

Supplementary material

**Supplementary Figure 1**: Directed acyclic graph to identify possible adjustments sets to estimate the total effects of persistent organic pollutants biomarkers on systemic inflammation.


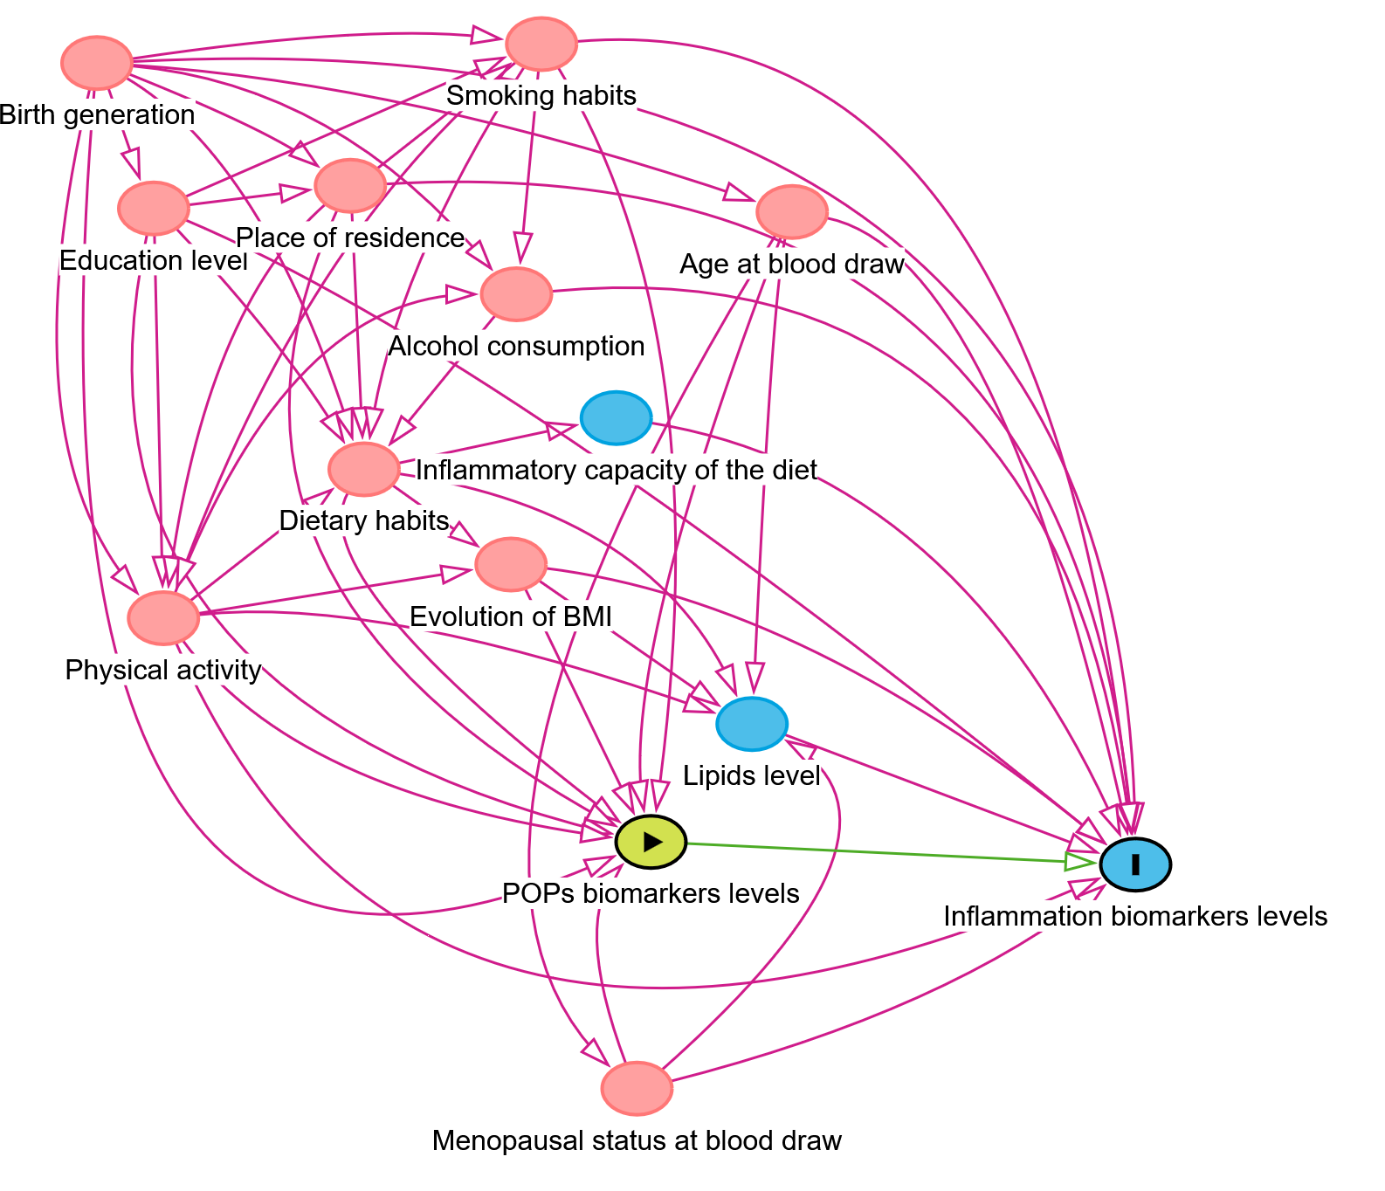


**Supplementary Figure 2**: Heat-map representing the Spearman rank correlation coefficients between the 45 POPs biomarkers after imputation of non-quantified values by the lower limit of quantification divided by √2.


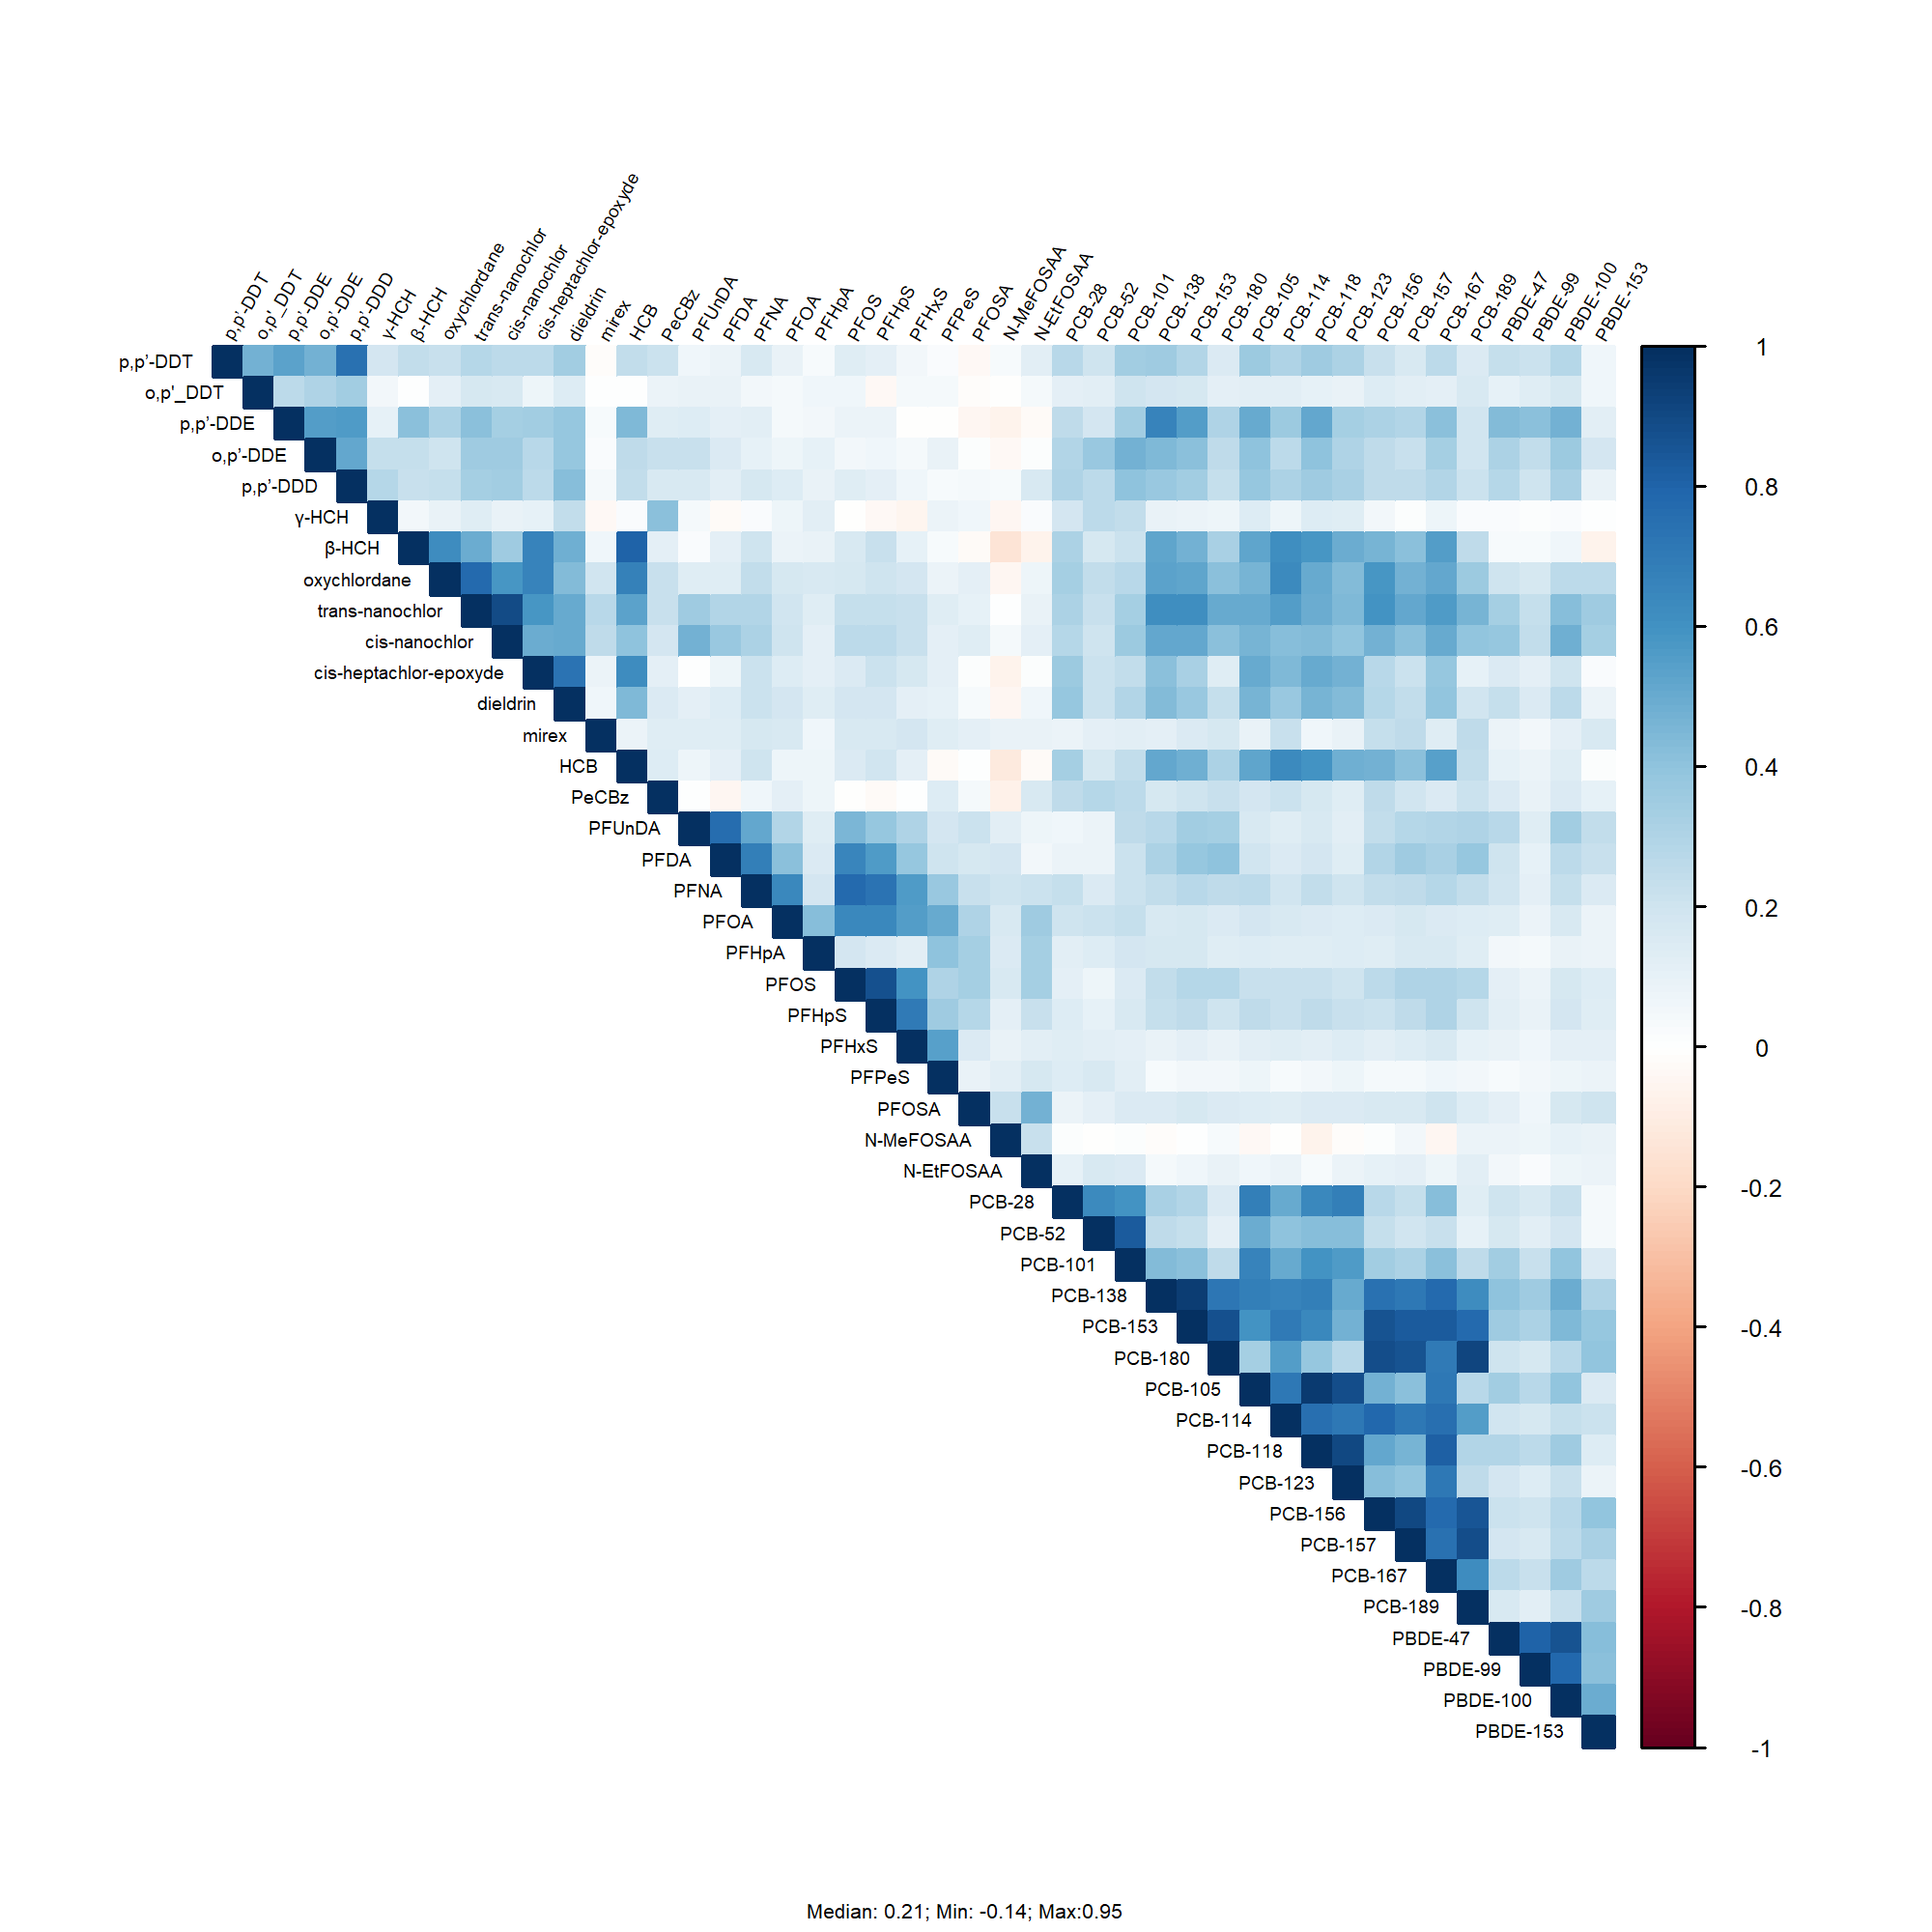


**Supplementary Figure 3**: Heat-map representing the Spearman rank correlation coefficients between the 4 biomarkers of systemic inflammation.


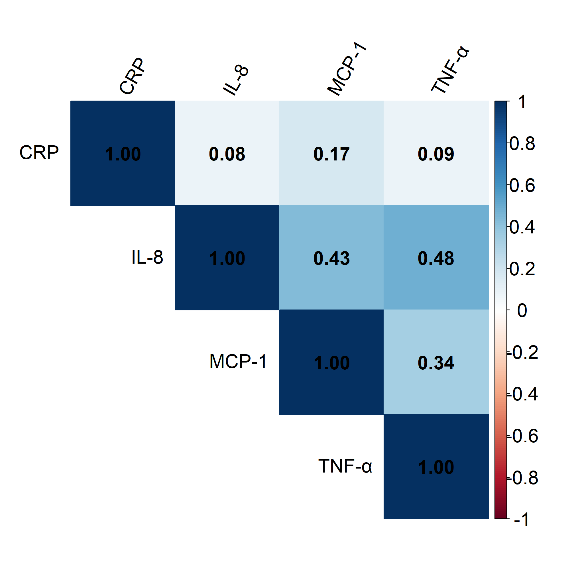


**Supplementary table 1:** Number and proportion of non-quantified values, imputation strategy, post-imputation median [interquartile range], and categorization of POPs and systemic inflammatory biomarkers

|  | Number (proportion) of non-quantified values | Imputation of non-quantified values | Medain [Q1-Q3] | Categorization |
| --- | --- | --- | --- | --- |
| PBDE-47 (pg/mL) | 1 (0.2%) | Yes, by LLOQ/√2 | 2.50 [1.65-4.14] | Continuous; 2 categories: <median/>median |
| PBDE-99 (pg/mL) | 5 (1.1%) | Yes, by LLOQ/√2 | 0.68 [0.48-1.03] | Continuous; 2 categories: <median/>median |
| PBDE-100 (pg/mL) | 2 (0.4%) | Yes, by LLOQ/√2 | 0.85 [0.57-1.33] | Continuous; 2 categories: <median/>median |
| PBDE-153 (pg/mL) | 1 (0.2%) | Yes, by LLOQ/√2 | 2.52 [1.97-3.38] | Continuous; 2 categories: <median/>median |
| PFUnDA (ng/mL) | 5 (1.1%) | Yes, by LLOQ/√2 | 0.15 [0.11-0.21] | Continuous; 2 categories: <median/>median |
| PFDA (ng/mL) | 1 (0.2%) | Yes, by LLOQ/√2 | 0.21 [0.16-0.28] | Continuous; 2 categories: <median/>median |
| PFNA (ng/mL) | 0 | - | 0.57 [0.42-0.75] | Continuous; 2 categories: <median/>median |
| PFOA (ng/mL) | 0 | - | 5.16 [3.83-7.50] | Continuous; 2 categories: <median/>median |
| PFHpA (ng/mL) | 38 (8.1%) | Yes, by LLOQ/√2 | 0.13 [0.07-0.25] | Continuous; 2 categories: <median/>median |
| PFOS (ng/mL) | 0 | - | 33.66 [25.66-42.69] | Continuous; 2 categories: <median/>median |
| PFHpS (ng/mL) | 0 | - | 0.37 [0.27-0.48] | Continuous; 2 categories: <median/>median |
| PFHxS (ng/mL) | 0 | - | 1.47 [1.10-2.09] | Continuous; 2 categories: <median/>median |
| PFPeS (ng/mL) | 116 (24.8%) | Yes, by LLOQ/√2 | 0.03 [0.02-0.04] | Continuous; 2 categories: <median/>median |
| PFOSA (ng/mL) | 2 (0.4%) | Yes, by LLOQ/√2 | 0.59 [0.42-0.85] | Continuous; 2 categories: <median/>median |
| N-MeFOSAA (ng/mL) | 4 (0.9%) | Yes, by LLOQ/√2 | 0.38 [0.26-0.60] | Continuous; 2 categories: <median/>median |
| N-EtFOSAA (ng/mL) | 1 (0.2%) | Yes, by LLOQ/√2 | 0.57 [0.39-0.88] | Continuous; 2 categories: <median/>median |
| p,p’-DDT (pg/mL) | 175 (35.7%) | No | 32.61 [11.15-72.17] | 2 categories : non-quantified/quantified |
| o,p’-DDT (pg/mL) | 344 (73.7%) | No | 2.51 [2.02-2.93] | 2 categories : non-quantified/quantified |
| p,p’-DDE (pg/mL) | 0 | - | 1709.33 [1017.37-2961.04] | Continuous; 2 categories: <median/>median |
| o,p’-DDE (pg/mL) | 11 (2.4%) | Yes, by LLOQ/√2 | 1.08 [0.69-1.58] | Continuous; 2 categories: <median/>median |
| p,p’-DDD (pg/mL) | 54 (11.6%) | Yes, by LLOQ/ | 2.96 [1.28-5.71] | Continuous; 2 categories: <median/>median |
| γ-HCH (pg/mL) | 307 (65.7%) | No | 16.09 [12.89-22.50] | Continuous; 2 categories: <median/>median |
| β-HCH (pg/mL) | 0 | - |  | Continuous; 2 categories: <median/>median |
| Oxychlordane (pg/mL) | 0 | - | 64.93 [50.54-85.27] | Continuous; 2 categories: <median/>median |
| trans-nanochlor (pg/mL) | 0 | - | 45.52 [37.24-59.31] | Continuous; 2 categories: <median/>median |
| cis-nanochlor (pg/mL) | 0 | - | 7.19 [5.27-9.85] | Continuous; 2 categories: <median/>median |
| cis-heptachlor-epoxyde(pg/mL) | 0 | - | 46.80 [33.84-69.61] | Continuous; 2 categories: <median/>median |
| Dieldrin (pg/mL) | 0 | - | 57.83 [38.82-84.24] | Continuous; 2 categories: <median/>median |
| HCB (pg/mL) | 0 | - | 247.00 [162.81-361.92] | Continuous; 2 categories: <median/>median |
| PeCBz (pg/mL) | 24 (5.1%) | Yes, by LLOQ/√2 | 5.71 [4.04-7.68] | Continuous; 2 categories: <median/>median |
| Mirex (pg/mL) | 337 (72.2%) | No | 2.86 [2.65-4.38] | 2 categories : non-quantified/quantified |
| PCB-28 (ng/mL) | 0 | - | 0.01 [0.01-0.02] | Continuous; 2 categories: <median/>median |
| PCB-52 (ng/mL) | 0 |  | 0.00 [0.00-0.01] | Continuous; 2 categories: <median/>median |
| PCB-101 (ng/mL) | 0 | - | 0.01 [0.00-0.01] | Continuous; 2 categories: <median/>median |
| PCB-138 (ng/mL) | 0 |  | 0.60 [0.44-0.79] | Continuous; 2 categories: <median/>median |
| PCB-153 (ng/mL) | 0 | - | 1.28 [0.98-1.63] | Continuous; 2 categories: <median/>median |
| PCB-180 (ng/mL) | 0 |  | 0.99 [0.78-1.28] | Continuous; 2 categories: <median/>median |
| PCB-105 (pg/mL) | 0 | - | 37.84 [24.62-56.38] | Continuous; 2 categories: <median/>median |
| PCB-114 (pg/mL) | 0 |  | 11.82 [8.80-15.75] | Continuous; 2 categories: <median/>median |
| PCB-118 (pg/mL) | 0 | - | 243.61 [168.36-331.53] | Continuous; 2 categories: <median/>median |
| PCB-123 (pg/mL) | 0 |  | 2.11 [1.45-3.30] | Continuous; 2 categories: <median/>median |
| PCB-156 (pg/mL) | 0 | - | 125.96 [102.04-152.60] | Continuous; 2 categories: <median/>median |
| PCB-157 (pg/mL) | 0 |  | 27.60 [21.60-35.33] | Continuous; 2 categories: <median/>median |
| PCB-167 (pg/mL) | 0 | - | 42.92 [32.51-56.72] | Continuous; 2 categories: <median/>median |
| PCB-189 (pg/mL) | 0 |  | 11.72 [9.21-15.81] | Continuous; 2 categories: <median/>median |
| TNF-α (pg/mL) | 304 (64.96%) | No | 3.4 [1.7-5.8] | 2 categories: non-quantified/quantified |
| IL-8 (pg/mL) | 185 (39.53%) | No | 0.8 [0.6-1.2] | 2 categories: non-quantified/quantified |
| CRP (µg/mL) | 59 (12.61%) | Yes, by extrapolated values | 25.9 [13.0-52.2] | Continuous; 2 categories: <median/>median |
| MCP-1 (pg/mL) | 0 | - | 165.5 [135.1-202.3] | Continuous; 2 categories: <median/>median |

**Supplementary table 2 :** Loading factors for POPs in the 6 retained principal components ordered by decreasing variance, after performing a principal component analysis with varimax rotation on biomarkers of 45 POPs in the blood samples of women of the French E3N cohort study (N = 467).

| Variable | Non-DDT OCPs and DL-PCBs | PCBs (DL and NDL) | PFAS | PBDEs | Mixed POP profile | DDT metabolites |
| --- | --- | --- | --- | --- | --- | --- |
| pp_DDT | 0.11 | -0.02 | 0.02 | -0.01 | 0.06 | 0.89 |
| op_DDT | 0.05 | 0.01 | -0.02 | -0.01 | 0.14 | 0.80 |
| pp_DDE | 0.48 | 0.21 | -0.08 | 0.14 | 0.12 | 0.46 |
| op_DDE | 0.21 | 0.14 | -0.01 | 0.05 | 0.12 | 0.55 |
| pp_DDD | 0.07 | 0.05 | 0.03 | 0.03 | 0.11 | 0.87 |
| g_HCH | -0.09 | 0.08 | 0.00 | -0.03 | 0.51 | 0.17 |
| b_HCH | 0.72 | 0.18 | -0.03 | -0.05 | 0.04 | 0.01 |
| oxychlordane | 0.68 | 0.34 | 0.09 | 0.02 | -0.09 | 0.06 |
| Trans_nanochlor | 0.61 | 0.46 | 0.19 | 0.05 | -0.13 | 0.15 |
| cis_nanochlor | 0.55 | 0.43 | 0.28 | 0.06 | -0.15 | 0.14 |
| Heptachlor_epoxyde_cis | 0.82 | -0.04 | 0.07 | -0.03 | -0.07 | 0.13 |
| Dieldrin | 0.54 | 0.08 | 0.10 | -0.03 | 0.05 | 0.25 |
| mirex | 0.10 | 0.26 | 0.24 | 0.00 | -0.07 | 0.09 |
| HCB | 0.69 | 0.09 | -0.06 | -0.04 | -0.08 | -0.03 |
| PeCBz | -0.02 | 0.15 | 0.00 | -0.05 | 0.40 | 0.17 |
| PFUnDA | -0.01 | 0.31 | 0.57 | 0.09 | -0.03 | 0.04 |
| PFDA | 0.01 | 0.27 | 0.66 | 0.02 | -0.02 | -0.05 |
| PFNA | 0.16 | 0.11 | 0.83 | 0.04 | -0.02 | 0.02 |
| PFOA | 0.05 | -0.01 | 0.73 | 0.02 | 0.08 | -0.03 |
| PFHpA | 0.08 | 0.00 | 0.44 | -0.01 | 0.14 | -0.02 |
| Total_PFOS | 0.11 | 0.15 | 0.83 | -0.01 | -0.05 | -0.02 |
| PFHpS | 0.14 | 0.06 | 0.82 | 0.02 | -0.07 | -0.01 |
| PFHxS | -0.04 | -0.04 | 0.41 | 0.01 | -0.10 | 0.16 |
| PFPeS | -0.02 | -0.04 | 0.55 | -0.02 | 0.09 | 0.00 |
| PFOSA | 0.02 | 0.14 | 0.37 | 0.03 | 0.21 | -0.08 |
| N_MeFOSAA | -0.14 | 0.06 | 0.24 | 0.13 | -0.04 | 0.00 |
| N_EtFOSAA | 0.03 | 0.00 | 0.26 | -0.05 | 0.09 | -0.01 |
| PCB_28 | 0.39 | -0.08 | 0.05 | 0.02 | 0.46 | 0.28 |
| PCB_52 | 0.06 | -0.01 | 0.09 | 0.02 | 0.79 | -0.01 |
| PCB_101 | 0.20 | 0.18 | 0.11 | 0.07 | 0.78 | 0.04 |
| PCB_138 | 0.49 | 0.69 | 0.09 | 0.14 | 0.17 | 0.12 |
| PCB_153 | 0.37 | 0.85 | 0.12 | 0.12 | 0.17 | 0.09 |
| PCB_180 | 0.09 | 0.93 | 0.12 | 0.06 | 0.09 | 0.04 |
| PCB_105 | 0.75 | 0.21 | 0.10 | 0.08 | 0.49 | 0.08 |
| PCB_114 | 0.58 | 0.55 | 0.06 | 0.02 | 0.38 | 0.04 |
| PCB_118 | 0.75 | 0.27 | 0.08 | 0.08 | 0.48 | 0.05 |
| PCB_123 | 0.73 | 0.18 | 0.09 | 0.03 | 0.47 | 0.01 |
| PCB_156 | 0.29 | 0.88 | 0.11 | 0.03 | 0.16 | 0.02 |
| PCB_157 | 0.20 | 0.90 | 0.10 | 0.06 | 0.13 | -0.01 |
| PCB_167 | 0.57 | 0.67 | 0.13 | 0.09 | 0.22 | 0.00 |
| PCB_189 | 0.03 | 0.92 | 0.13 | 0.02 | 0.06 | 0.04 |
| PBDE_47 | 0.04 | 0.00 | 0.01 | 0.94 | -0.01 | 0.00 |
| PBDE_99 | 0.03 | 0.00 | -0.02 | 0.94 | 0.00 | 0.01 |
| PBDE_100 | 0.06 | 0.06 | 0.03 | 0.97 | 0.01 | 0.04 |
| PBDE_153 | -0.07 | 0.22 | 0.06 | 0.65 | 0.02 | 0.04 |

**Supplementary table 3**: Logistic regression models with false discovery rate (FDR) correction (Benjamini-Hochberg method), estimating adjusted associations between 45 POPs biomarkers and four biomarkers of systemic inflammation (CRP, IL-8, MCP-1, and TNFα). Each POP biomarker is fitted in a separate model, adjusted for age at blood draw, birth generation, years of school education, residential area, smoking status, physical activity, variation of BMI, alcohol consumption, inflammatory capacity of the diet, menopausal status, and lipid plasma level

| Variable | CRP OR [95% CI] | CRP p | IL-8 OR [95% CI] | IL-8 p | MCP-1 OR [95% CI] | MCP-1 p | TNF-α OR [95% CI] | TNF-α p |
| --- | --- | --- | --- | --- | --- | --- | --- | --- |
| p,p’-DDT, Quantified (ref: Non-quantified) | 1.05 [0.72; 1.55] | 0.95 | 0.91 [0.61; 1.34] | 0.94 | 1.28 [0.87; 1.89] | 0.76 | 0.92 [0.62; 1.38] | 0.93 |
| o,p'-DDT, Quantified (ref: Non-quantified) | 0.75 [0.49; 1.14] | 0.52 | 0.62 [0.40; 0.95] | 0.34 | 0.85 [0.55; 1.30] | 0.74 | 0.91 [0.58; 1.40] | 0.98 |
| p,p’-DDE, >Median (ref: <=Median) | 1.40 [0.97; 2.04] | 0.40 | 1.11 [0.76; 1.63] | 0.83 | 0.83 [0.57; 1.22] | 0.83 | 0.81 [0.54; 1.19] | 0.83 |
| o,p’-DDE, >Median (ref: <=Median) | 1.52 [1.05; 2.21] | 0.34 | 0.80 [0.55; 1.18] | 0.90 | 0.92 [0.63; 1.34] | 0.92 | 0.77 [0.52; 1.14] | 0.76 |
| p,p’-DDD, >Median (ref: <=Median) | 1.01 [0.69; 1.47] | 0.93 | 0.89 [0.60; 1.30] | 0.93 | 1.00 [0.68; 1.46] | 1.00 | 0.86 [0.58; 1.27] | 0.90 |
| γ-HCH, Quantified (ref : Non-quantified) | 1.17 [0.79; 1.73] | 0.83 | 0.89 [0.60; 1.33] | 0.94 | 1.04 [0.70; 1.54] | 0.98 | 0.95 [0.63; 1.42] | 0.88 |
| β-HCH, >Median (ref: <=Median) | 2.14 [1.44; 3.20] | 0.08 | 0.77 [0.51; 1.15] | 0.54 | 0.82 [0.54; 1.22] | 0.52 | 1.03 [0.68; 1.56] | 0.93 |
| oxychlordane, >Median (ref: <=Median) | 1.46 [1.00; 2.13] | 0.43 | 0.94 [0.63; 1.38] | 0.95 | 0.77 [0.52; 1.14] | 0.29 | 1.25 [0.84; 1.86] | 0.83 |
| trans-nanochlor, >Median (ref: <=Median) | 1.50 [1.03; 2.19] | 0.34 | 0.82 [0.56; 1.20] | 0.88 | 0.96 [0.66; 1.40] | 0.83 | 1.09 [0.74; 1.61] | 0.93 |
| cis-nanochlor, >Median (ref: <=Median) | 1.38 [0.95; 2.00] | 0.34 | 0.61 [0.42; 0.90] | 0.34 | 0.79 [0.54; 1.15] | 0.53 | 0.82 [0.55; 1.21] | 0.83 |
| cis-heptachlor-epoxyde, >Median (ref: <=Median) | **2.29 [1.56; 3.36]** | **0.01** | 1.01 [0.68; 1.49] | 0.94 | 0.83 [0.56; 1.22] | 0.45 | 1.47 [0.99; 2.19] | 0.34 |
| dieldrin, >Median (ref: <=Median) | 1.96 [1.35; 2.87] | 0.08 | 0.85 [0.58; 1.25] | 0.90 | 1.16 [0.79; 1.69] | 0.93 | 1.41 [0.95; 2.08] | 0.35 |
| mirex, Quantified (ref: Non-quantified) | 1.20 [0.79; 1.81] | 0.83 | 0.68 [0.44; 1.03] | 0.34 | 0.90 [0.59; 1.37] | 0.88 | 0.77 [0.49; 1.18] | 0.78 |
| HCB, >Median (ref: <=Median) | 1.83 [1.25; 2.70] | 0.12 | 0.76 [0.51; 1.13] | 0.58 | 0.62 [0.42; 0.92] | 0.15 | 1.20 [0.80; 1.79] | 0.88 |
| PeCBz, >Median (ref: <=Median) | 0.85 [0.59; 1.23] | 0.83 | 1.13 [0.77; 1.65] | 0.76 | 0.72 [0.50; 1.05] | 0.34 | 0.81 [0.55; 1.19] | 0.78 |
| PFUnDA, >Median (ref: <=Median) | 0.92 [0.63; 1.33] | 0.83 | 0.59 [0.40; 0.87] | 0.22 | 0.99 [0.68; 1.44] | 0.93 | 0.85 [0.57; 1.25] | 0.93 |
| PFDA, >Median (ref: <=Median) | 1.03 [0.71; 1.50] | 0.93 | 0.54 [0.36; 0.79] | 0.08 | 0.98 [0.67; 1.44] | 0.88 | 0.78 [0.53; 1.15] | 0.70 |
| PFNA, >Median (ref: <=Median) | 0.86 [0.59; 1.26] | 0.88 | 0.58 [0.39; 0.86] | 0.12 | 0.94 [0.64; 1.37] | 0.84 | 0.64 [0.43; 0.96] | 0.34 |
| PFOA, >Median (ref: <=Median) | 0.83 [0.57; 1.21] | 0.88 | 0.80 [0.55; 1.18] | 0.64 | 1.19 [0.82; 1.74] | 0.83 | 0.83 [0.56; 1.23] | 0.83 |
| PFHpA, >Median (ref: <=Median) | 1.07 [0.74; 1.55] | 0.83 | 1.17 [0.80; 1.71] | 0.83 | 1.81 [1.24; 2.64] | 0.05 | 1.19 [0.81; 1.75] | 0.54 |
| PFOS, >Median (ref: <=Median) | 0.71 [0.49; 1.05] | 0.36 | **0.47 [0.31; 0.70]** | **0.01** | 0.87 [0.59; 1.28] | 0.83 | 0.83 [0.56; 1.24] | 0.81 |
| PFHpS, >Median (ref: <=Median) | 0.85 [0.57; 1.26] | 0.83 | 0.64 [0.42; 0.96] | 0.27 | 0.98 [0.65; 1.45] | 0.93 | 0.72 [0.48; 1.10] | 0.55 |
| PFHxS, >Median (ref: <=Median) | 1.01 [0.70; 1.47] | 0.93 | 0.62 [0.42; 0.92] | 0.17 | 0.75 [0.51; 1.09] | 0.43 | 0.66 [0.44; 0.98] | 0.34 |
| PFPeS, >Median (ref: <=Median) | 0.79 [0.53; 1.17] | 0.84 | 0.84 [0.57; 1.26] | 0.83 | 0.69 [0.47; 1.03] | 0.43 | 0.76 [0.50; 1.15] | 0.83 |
| PFOSA, >Median (ref: <=Median) | 0.87 [0.60; 1.26] | 0.93 | 1.07 [0.73; 1.56] | 0.95 | 1.46 [1.01; 2.13] | 0.34 | 0.91 [0.62; 1.34] | 0.93 |
| N-MeFOSAA, >Median (ref: <=Median) | 1.03 [0.71; 1.49] | 0.90 | 0.96 [0.66; 1.40] | 0.83 | 0.90 [0.62; 1.31] | 0.90 | 0.87 [0.59; 1.28] | 0.83 |
| N-EtFOSAA, >Median (ref: <=Median) | 0.82 [0.56; 1.18] | 0.99 | 1.17 [0.80; 1.71] | 0.88 | 1.31 [0.90; 1.90] | 0.44 | 1.04 [0.71; 1.52] | 0.93 |
| PCB-28, >Median (ref: <=Median) | 1.35 [0.93; 1.97] | 0.40 | 0.80 [0.54; 1.18] | 0.83 | 1.01 [0.69; 1.49] | 0.99 | 0.87 [0.58; 1.29] | 0.83 |
| PCB-52, >Median (ref: <=Median) | 0.99 [0.68; 1.44] | 0.98 | 0.86 [0.59; 1.26] | 0.90 | 0.99 [0.68; 1.44] | 0.99 | 0.82 [0.55; 1.20] | 0.83 |
| PCB-101, >Median (ref: <=Median) | 0.98 [0.67; 1.42] | 0.96 | 0.78 [0.53; 1.15] | 0.83 | 1.07 [0.73; 1.56] | 0.93 | 0.99 [0.67; 1.47] | 0.93 |
| PCB-138, >Median (ref: <=Median) | 1.25 [0.85; 1.82] | 0.83 | 0.73 [0.49; 1.08] | 0.44 | 0.83 [0.56; 1.22] | 0.45 | 1.02 [0.68; 1.51] | 0.93 |
| PCB-153, >Median (ref: <=Median) | 0.99 [0.68; 1.44] | 0.95 | 0.73 [0.49; 1.08] | 0.34 | 1.01 [0.69; 1.47] | 0.88 | 1.09 [0.73; 1.61] | 0.99 |
| PCB-180, >Median (ref: <=Median) | 0.77 [0.53; 1.12] | 0.54 | 0.86 [0.59; 1.26] | 0.70 | 1.06 [0.73; 1.55] | 0.93 | 1.12 [0.76; 1.65] | 0.94 |
| PCB-105, >Median (ref: <=Median) | 1.18 [0.80; 1.73] | 0.83 | 0.71 [0.47; 1.05] | 0.57 | 1.09 [0.74; 1.61] | 0.98 | 1.04 [0.70; 1.55] | 0.98 |
| PCB-114, >Median (ref: <=Median) | 1.06 [0.72; 1.56] | 1.00 | 0.62 [0.41; 0.93] | 0.22 | 1.01 [0.68; 1.49] | 0.83 | 1.10 [0.73; 1.66] | 0.99 |
| PCB-118, >Median (ref: <=Median) | 1.17 [0.80; 1.72] | 0.74 | 0.60 [0.40; 0.89] | 0.27 | 0.86 [0.58; 1.27] | 0.83 | 0.95 [0.64; 1.42] | 0.88 |
| PCB-123, >Median (ref: <=Median) | 1.28 [0.87; 1.87] | 0.69 | 0.81 [0.55; 1.20] | 0.83 | 1.10 [0.75; 1.62] | 1.00 | 1.29 [0.86; 1.92] | 0.67 |
| PCB-156, >Median (ref: <=Median) | 0.91 [0.62; 1.32] | 0.83 | 0.76 [0.51; 1.11] | 0.40 | 1.04 [0.71; 1.52] | 0.90 | 1.11 [0.75; 1.63] | 0.98 |
| PCB-157, >Median (ref: <=Median) | 0.67 [0.46; 0.98] | 0.34 | 0.81 [0.55; 1.19] | 0.34 | 1.11 [0.76; 1.62] | 0.96 | 1.32 [0.89; 1.95] | 0.78 |
| PCB-167, >Median (ref: <=Median) | 1.05 [0.71; 1.55] | 0.93 | 0.67 [0.44; 1.00] | 0.34 | 0.74 [0.50; 1.11] | 0.34 | 1.20 [0.80; 1.80] | 0.83 |
| PCB-189, >Median (ref: <=Median) | 0.77 [0.53; 1.12] | 0.45 | 0.90 [0.61; 1.31] | 0.78 | 1.38 [0.95; 2.01] | 0.71 | 1.29 [0.88; 1.90] | 0.74 |
| PBDE-47, >Median (ref: <=Median) | 0.90 [0.62; 1.30] | 0.83 | 0.82 [0.56; 1.19] | 0.93 | 0.72 [0.49; 1.04] | 0.34 | 1.07 [0.73; 1.57] | 0.83 |
| PBDE-99, >Median (ref: <=Median) | 1.24 [0.86; 1.80] | 0.83 | 0.99 [0.68; 1.44] | 0.88 | 1.00 [0.69; 1.45] | 0.92 | 0.92 [0.63; 1.35] | 0.93 |
| PBDE-100, >Median (ref: <=Median) | 1.08 [0.74; 1.56] | 0.94 | 0.91 [0.62; 1.33] | 0.93 | 0.85 [0.58; 1.23] | 0.67 | 1.04 [0.70; 1.52] | 0.88 |
| PBDE-153, >Median (ref: <=Median) | 0.69 [0.48; 1.00] | 0.34 | 0.72 [0.49; 1.05] | 0.43 | 0.74 [0.51; 1.08] | 0.12 | 1.03 [0.70; 1.51] | 0.94 |
